# Supplementary material for: Functional siRNA Delivery by Extracellular Vesicle–Liposome Hybrid Nanoparticles
Source: PubMed Central journal article supplement — Adv Healthc Mater. 2021 Aug 11;11(5):2101202. doi: 10.1002/adhm.202101202 (PMC11468224; doi:10.1002/adhm.202101202), 2021-08-11
Supplement: ADHM-11-2101202-s001.pdf [file ADHM-11-2101202-s001.pdf]

# ADVANCED HEALTHCARE MATERIALS

## Supporting Information

for *Adv. Healthcare Mater.*, DOI: 10.1002/adhm.202101202

### Functional siRNA Delivery by Extracellular Vesicle- Liposome Hybrid Nanoparticles

*Martijn J.W. Evers<sup>1</sup>, Simonides I. van de Wakker<sup>2</sup>, Ellis M. de Groot<sup>1</sup>,  
Olivier G. de Jong<sup>1,3</sup>, Jerney J.J. Gitz-François<sup>1</sup>, Cor S. Seinen<sup>1</sup>, Joost  
P.G. Sluijter<sup>2,4</sup>, Raymond M. Schiffelers<sup>1</sup>, Pieter Vader<sup>1,2\*</sup>*

## **Functional siRNA delivery by Extracellular Vesicle-Liposome Hybrid Nanoparticles**

Martijn J.W. Evers<sup>1</sup>, Simonides I. van de Wakker<sup>2</sup>, Ellis de Groot<sup>1</sup>, Olivier G. de Jong<sup>1,3</sup>,  
Jerney J.J. Gitz-François<sup>1</sup>, Cor S. Seinen<sup>1</sup>, Joost P.G. Sluiter<sup>2,4</sup>, Raymond M. Schiffelers<sup>1</sup>,  
Pieter Vader<sup>1,2\*</sup>

## **Supporting Information**

## Supplementary Table

**Table S1:** Oligonucleotide sequences

|                          |                                                |
|--------------------------|------------------------------------------------|
| siRNA firefly luciferase | Sense: '5-GGA CGA GGU GCC UAA AGG AdCdG-3'     |
|                          | Antisense: '5-UCC UUU AGG CAC CUC GUC CdCdG-3' |
| siRNA non specific       | Sense: 5'-UGC GCU ACG AUC GAC GAU GdTdT-3'     |
|                          | Antisense: 5'-CAU CGU CGA UCG UAG CGC AdTdT-3' |

dT, dC, & dG indicate a deoxyribonucleic acid base

## Supplementary Figures

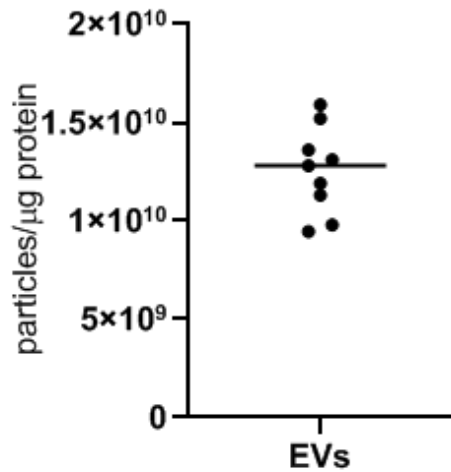

**Figure S1: Batch to batch variability of EV purity.**

EV purity is expressed as the number of particles per μg protein. Each datapoint represents an EV isolation. (n=9, biological replicates)

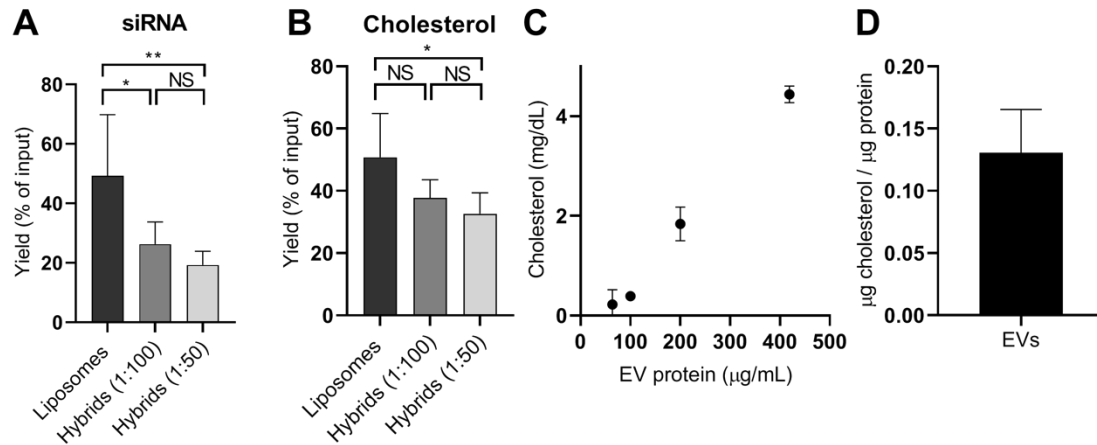

**Figure S2: siRNA and cholesterol yield of production process.**

The total amount of **A)** siRNA and **B)** cholesterol detected in liposomes and hybrids after dialysis expressed as percentage of the input amount. **C)** Cholesterol content of EVs at different EV-protein concentrations. **D)** Cholesterol content of EVs expressed per µg EV-protein. Data in A/B are shown as mean ± SD (n=6-7, biological replicates), One-way ANOVA with Tukey's post-hoc test, ns= not significant, \* = p<0.05, \*\* = p<0.01. Data in C is shown as mean ± SD (n=3, technical triplicate). Data in D is shown as mean ± SD (n=2, biological replicate).

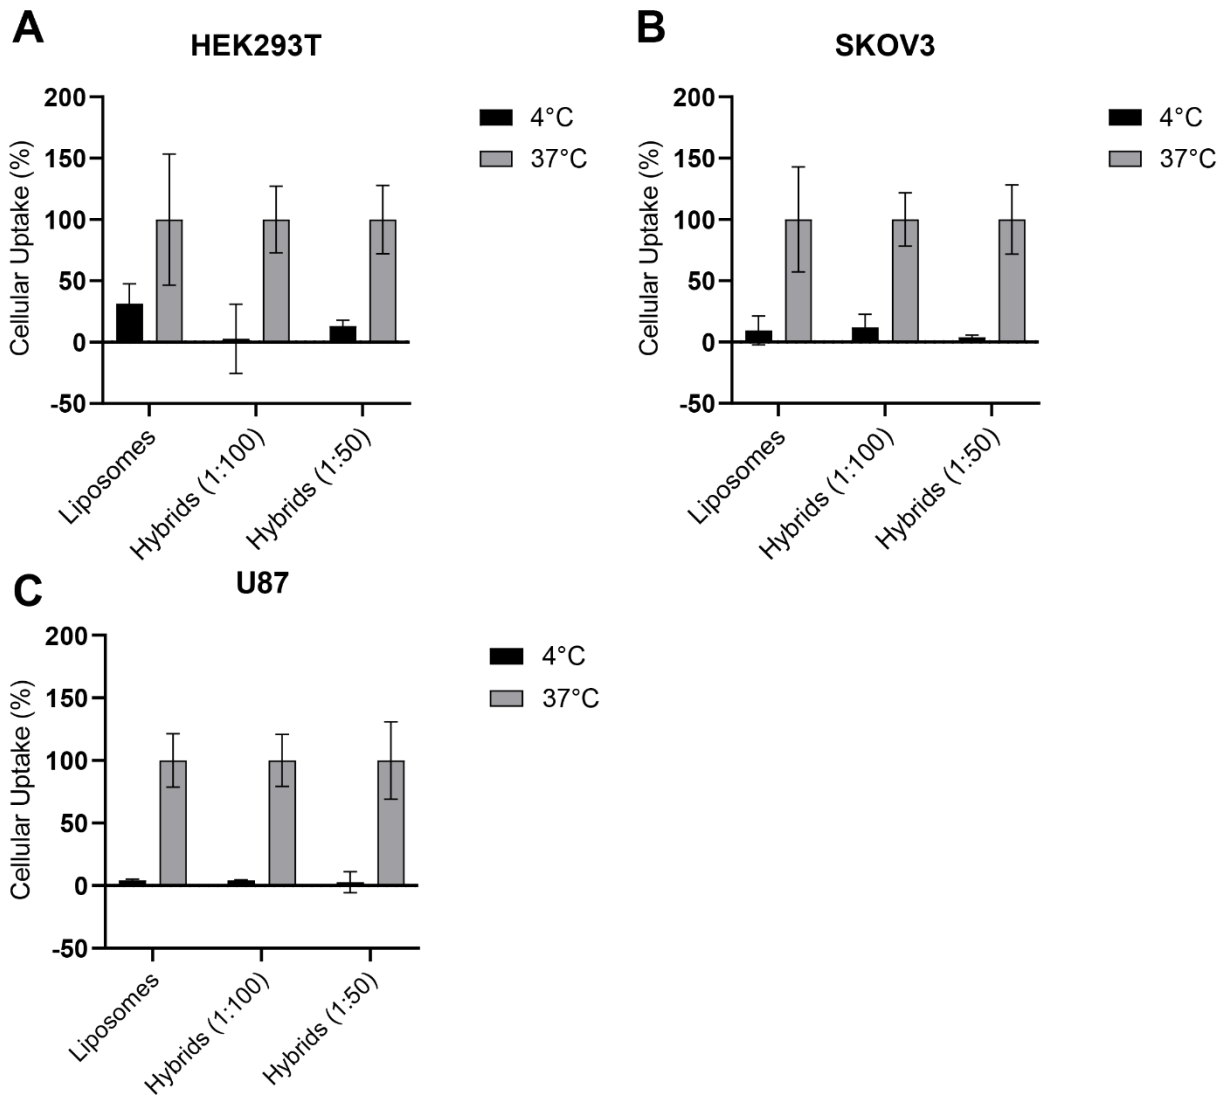

**Figure S3: Cellular uptake analysis of liposomes and hybrids in different cell types**  
 Cellular uptake in A) HEK293T-dluc. B) SKOV3-dluc. C) U87-MG-dluc as determined by flow cytometry and plotted as a percentage relative to the uptake observed at 37 °C. Data are plotted as mean  $\pm$  SD (n=3, technical replicates).

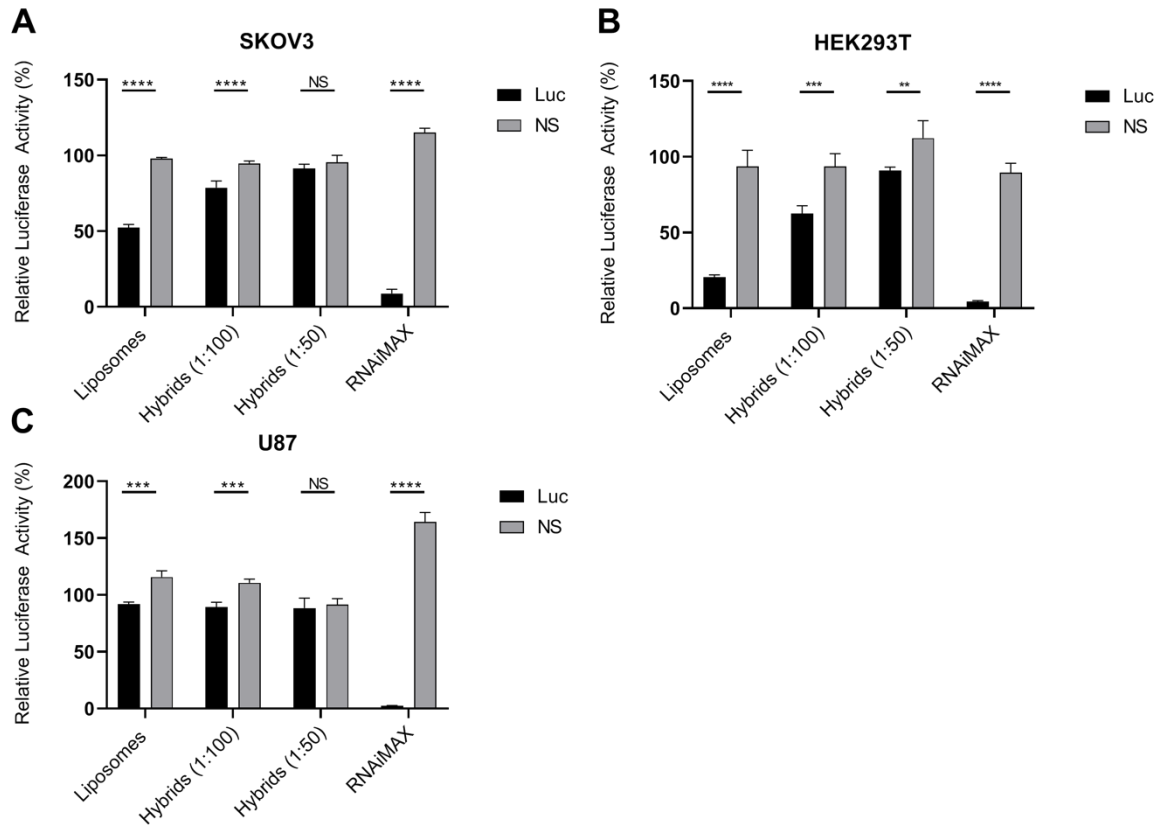

**Figure S4: Gene silencing of firefly luciferase by liposome-, hybrid- or RNAiMAX mediated siRNA delivery in different cell types.** siRNA targeting firefly luciferase (luc) or a non-specific siRNA (NS) was delivered via liposomes, hybrids or RNAiMAX and luciferase expression was measured after 48 hours incubation and normalized to renilla luciferase expression. Different cell types, **A**) SKOV3-dluc **B**) HEK293T-dluc **C**) U87-MG-dluc, were incubated with liposomes and hybrids at an siRNA concentration of 50 nM. For, RNAiMAX the concentration was 10 nM siRNA. Data are plotted as mean  $\pm$  SD, n=3, technical replicates, two-way ANOVA with sidak's post-hoc test, ns = not significant, \*\* p = <0.01, \*\*\* = p <0.001, \*\*\*\* = p < 0.0001

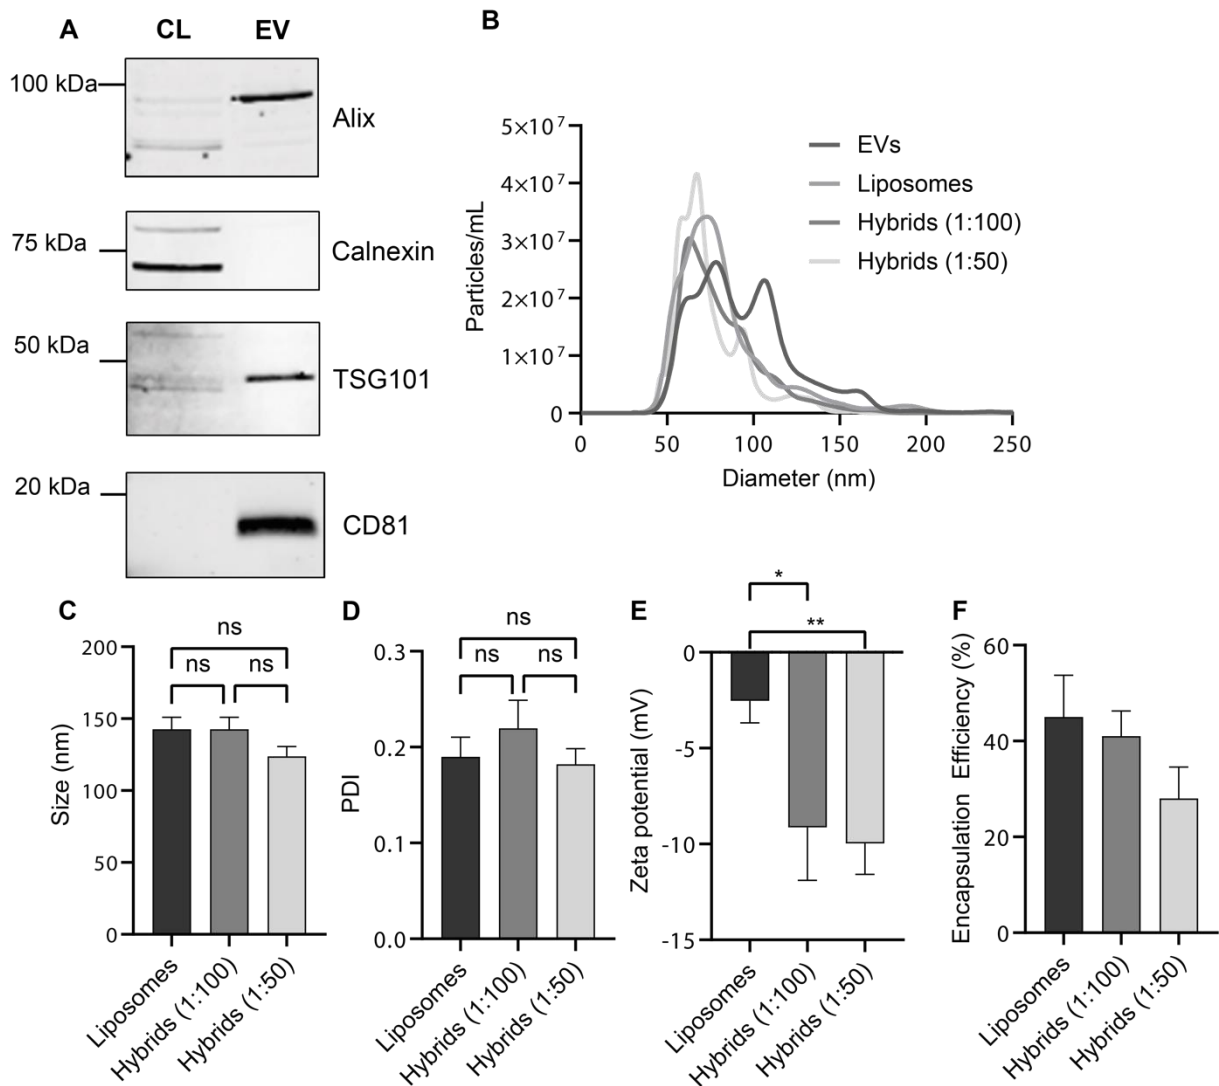

**Figure S5: Characterization of CPC-derived EVs, liposomes and hybrids.** **A)** Western Blot analysis of CPC cell lysate (CL) and CPC-derived EVs shows enrichment of typical EV markers Alix, TSG101 and CD81 and negative enrichment of a EV-negative marker, calnexin. **B)** NTA analysis of CPC-derived EVs, liposomes and hybrids. **C)** Nanoparticle size as determined by DLS. **D)** Polydispersity index of nanoparticles as measured by DLS. **E)** Zeta potential of nanoparticles as measured by laser doppler electrophoresis. **F)** RNA encapsulation efficiency of nanoparticles determined based on the cholesterol and siRNA concentrations before and after dialysis. Mean + SD is displayed for all samples (n=3, biological replicates), one-way ANOVA with tukey's post-hoc test, ns= not significant, \* = p<0.05, \*\* = p<0.01.
